# Supplementary material for: Identifying suitable ionic liquid electrolytes for Al dual-ion batteries: role of electrochemical window, conductivity and voltage
Source: Royal Society of Chemistry journal article supplement (doi:10.1039/d0ma00292e), 2020-01-01
Supplement: d0ma00292e1.pdf [file d0ma00292e1.pdf]

## Electronic Supplementary Information (ESI)

### Identifying the Suitable Ionic Liquid Electrolytes in Al Dual-Ion Batteries: Role of Electrochemical Window, Conductivity and Voltage

Surya Sekhar Manna,<sup>†</sup> Preeti Bhauriyal,<sup>†</sup> Biswarup Pathak,<sup>†,\*</sup>

<sup>†</sup>Discipline of Chemistry, Indian Institute of Technology (IIT) Indore, Indore, Madhya Pradesh  
453552, India

Email: [biswarup@iiti.ac.in](mailto:biswarup@iiti.ac.in)

#### Contents:

**Figure S1.** Different orientation of considered ionic liquid. RE (in eV) is the relative energy.

**Table S1.** Cathodic and anodic potential value (vs. Al/Al<sup>3+</sup>).

**Figure S2.** Charges are showing of Nitrogen atom of both (a) EMIM and (b) BMP.

**Table S2.** Viscosity and density of the considered ionic liquid electrolytes at room temperature.

**Table S3.** Cationic radii of the considered ionic liquid electrolytes. The anion (AlCl<sub>4</sub><sup>-</sup>) radii is 2.84 Å.

**Figure S3.** Optimised structure and corresponding energy of (Cation)<sup>+</sup> Al<sub>2</sub>Cl<sub>7</sub><sup>-</sup> systems.

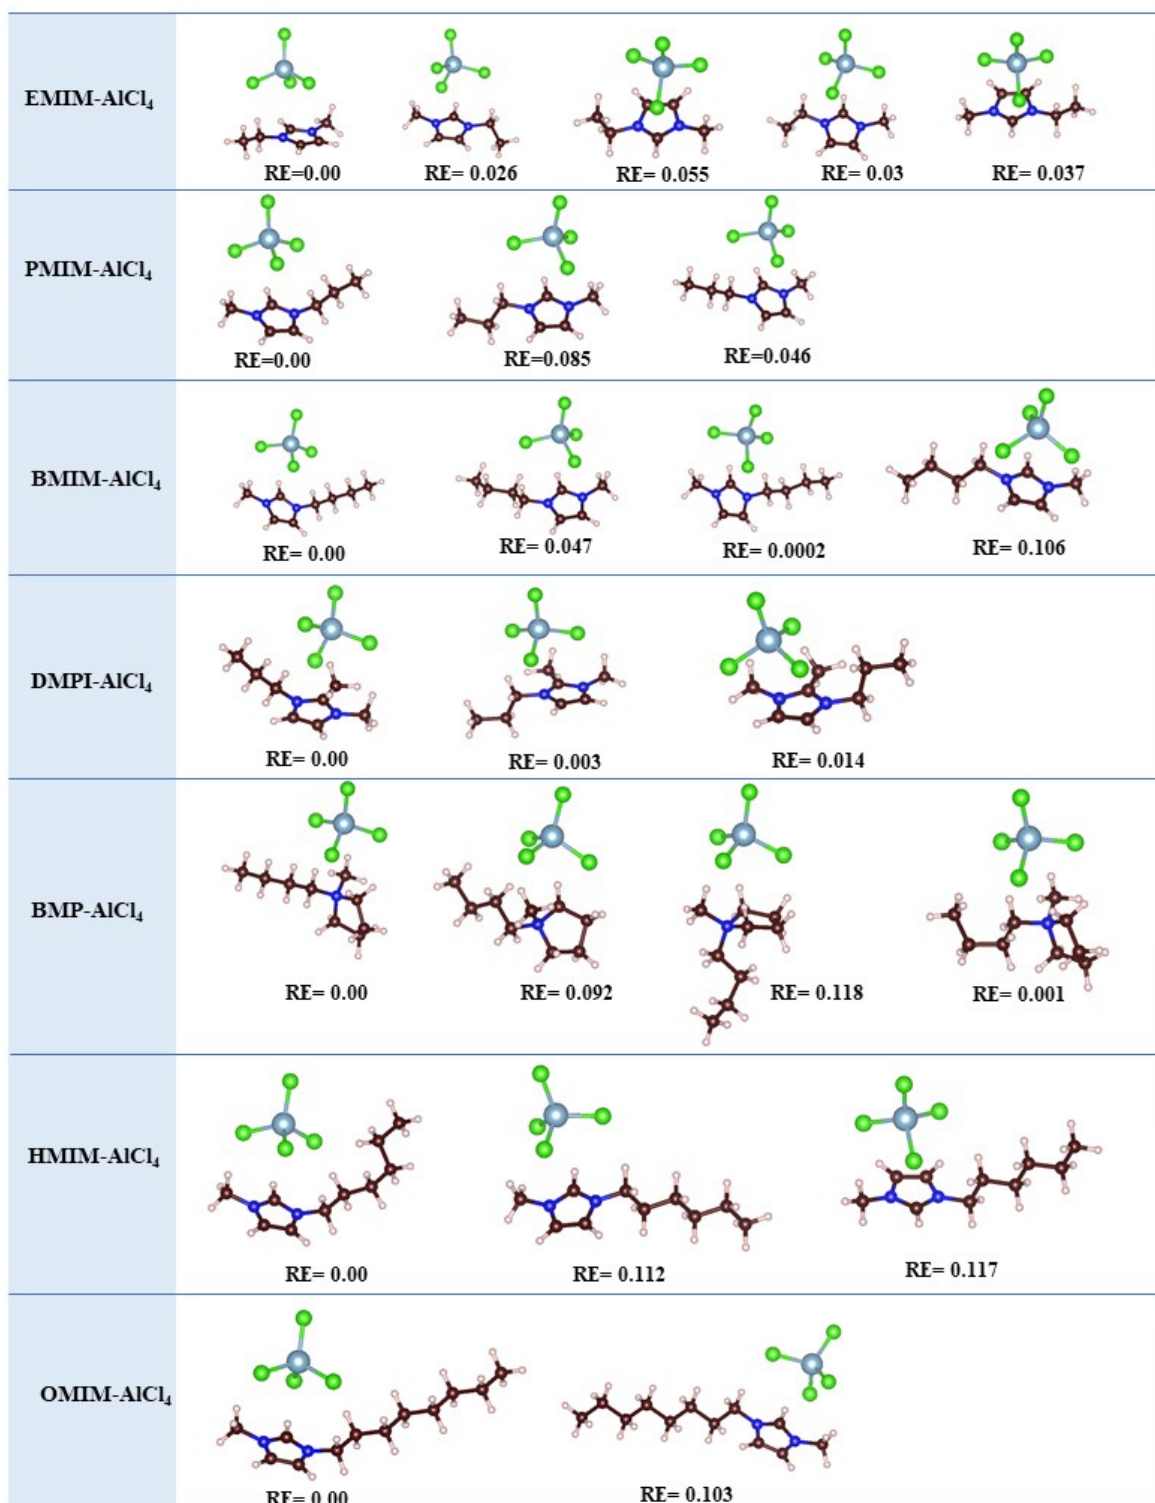

**Figure S1.** Different orientation of considered ionic liquid. RE (in eV) is the relative energy.

**Table S1.** Cathodic and anodic potential value (vs. Al/Al<sup>3+</sup>).

| <b>Electrolyte</b>      | <b>Cathodic limiting potential (V<sub>CL</sub>)</b> | <b>Anodic limiting potential (V<sub>AL</sub>)</b> |
|-------------------------|-----------------------------------------------------|---------------------------------------------------|
| EMIM-AlCl <sub>4</sub>  | -2.0                                                | 2.34 <sup>1</sup>                                 |
| PMIM- AlCl <sub>4</sub> | -2.2                                                | 2.5 <sup>2</sup>                                  |
| BMIM- AlCl <sub>4</sub> | -2.1                                                | 2.6 <sup>3</sup>                                  |
| DMPI- AlCl <sub>4</sub> | -1.4                                                | 2.23 <sup>4</sup>                                 |
| BMP- AlCl <sub>4</sub>  | -0.1                                                | 0.15 <sup>5</sup>                                 |
| Urea- AlCl <sub>4</sub> | -1.4                                                | 1.7 <sup>6</sup>                                  |
| AcAm-AlCl <sub>4</sub>  | -1.25                                               | 0.85 <sup>7</sup>                                 |

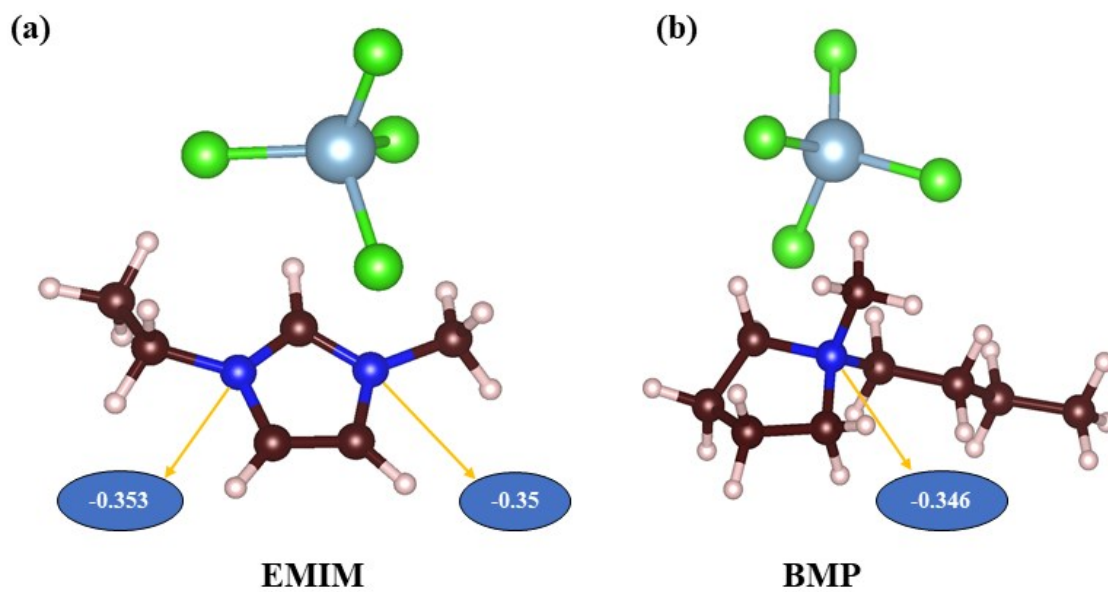

**Figure S2.** NBO charges on nitrogen atoms of (a) EMIM-AlCl<sub>4</sub> and (b) BMP-AlCl<sub>4</sub>.

**Table S2.** Viscosity and density of the considered ionic liquid electrolytes at room temperature.

| <b>Ionic Liquid</b>    | <b>Viscosity (P)</b> | <b>Density (kg/m<sup>3</sup>)</b> |
|------------------------|----------------------|-----------------------------------|
| EMIM-AlCl <sub>4</sub> | 0.18                 | 1294 <sup>8</sup>                 |
| PMIM-AlCl <sub>4</sub> | 0.19                 | 1262 <sup>9</sup>                 |
| BMIM-AlCl <sub>4</sub> | 0.24                 | 1238 <sup>10</sup>                |
| DMPI-AlCl <sub>4</sub> | 0.32                 | 1170 <sup>11</sup>                |
| HMIM-AlCl <sub>4</sub> | 0.40                 | 1195 <sup>12</sup>                |
| OMIM-AlCl <sub>4</sub> | 0.42                 | 1193 <sup>12</sup>                |
| Urea-AlCl <sub>4</sub> | 0.25                 | 1500 <sup>13</sup>                |
| AcAm-AlCl <sub>4</sub> | 0.59                 | 1450 <sup>13</sup>                |

**Table S3.** Cationic radii of the considered ionic liquid electrolytes. The anion ( $\text{AlCl}_4^-$ ) radii is 2.84 Å.

| <b>Cation (<math>\text{R}_+</math>)</b> | <b>vdW volume (Å<sup>3</sup>)</b> | <b>Radii (Å)</b> |
|-----------------------------------------|-----------------------------------|------------------|
| EMIM                                    | 115.53                            | 3.02             |
| PMIM                                    | 132.53                            | 3.16             |
| BMIM                                    | 149.49                            | 3.29             |
| DMPI                                    | 149.43                            | 3.29             |
| HMIM                                    | 183.42                            | 3.52             |
| OMIM                                    | 217.33                            | 3.73             |
| Urea                                    | 154.21                            | 3.32             |
| AcAm                                    | 165.83                            | 3.4              |

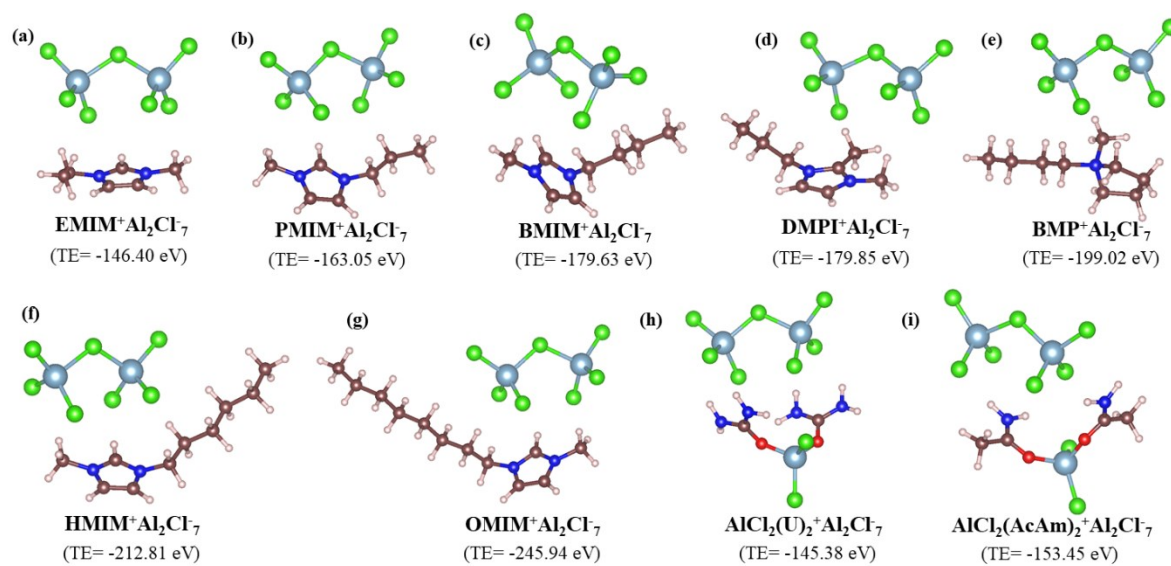

**Figure S3.** Optimised structure and corresponding total energy (TE) of Cation<sup>+</sup>Al<sub>2</sub>Cl<sub>7</sub><sup>-</sup> systems, (a) EMIM<sup>+</sup>Al<sub>2</sub>Cl<sub>7</sub><sup>-</sup>, (b) PMIM<sup>+</sup>Al<sub>2</sub>Cl<sub>7</sub><sup>-</sup>, (c) BMIM<sup>+</sup>Al<sub>2</sub>Cl<sub>7</sub><sup>-</sup>, (d) DMPI<sup>+</sup>Al<sub>2</sub>Cl<sub>7</sub><sup>-</sup>, (e) BMP<sup>+</sup>Al<sub>2</sub>Cl<sub>7</sub><sup>-</sup>, (f) HMIM<sup>+</sup>Al<sub>2</sub>Cl<sub>7</sub><sup>-</sup>, (g) OMIM<sup>+</sup>Al<sub>2</sub>Cl<sub>7</sub><sup>-</sup>, (h) AlCl<sub>2</sub>(U)<sub>2</sub><sup>+</sup>Al<sub>2</sub>Cl<sub>7</sub><sup>-</sup>, (i) AlCl<sub>2</sub>(AcAm)<sub>2</sub><sup>+</sup>Al<sub>2</sub>Cl<sub>7</sub><sup>-</sup>

## References

1. H. Sun, W. Wang, Z. Yu, Y. Yuan, S. Wang and S. Jiao, *Chem. Commun.*, 2015, **51**, 11892-11895.
2. G. E. Gray, J. Winnick and P. A. Kohl, *J. Electrochem. Soc.*, 1996, **143**, 3820.

3. H. Wang, S. Gu, Y. Bai, S. Chen, N. Zhu, C. Wu and F. Wu, *J. Mater. Chem. A*, 2015, **3**, 22677–22686.
4. Z. Lv, M. Han, J. Sun, L. Hou, H. Chen, Y. Li and M. -C. Lin, *Journal of Power Sources*, 2019, **418**, 233–240.
5. P. Giridhar, S. Zein El Abedin and F. Endres, *Electrochimica Acta*, 2012, **70**, 210–214.
6. M. Angell, C. -J. Pan, Y. Rong, C. Yuan, M. -C. Lin, B. -J. Hwang and H. Dai, *Proc. Natl. Acad. Sci. U. S. A.*, 2017, **114**, 834–839.
7. M. Li, B. Gao, C. Liu, W. Chen, Z. Shi, X. Hu and Z. Wang, *Electrochimica Acta*, 2015, **180**, 811–814.
8. S. V. Sambasivarao and O. Acevedo, *J. Chem. Theory Comput.*, 2009, **5**, 1038–1050.
9. A. A. Jr. Fannin, D. A. Floreani, L. A. King, J. S. Landers, B. J. Piersma, D. J. Stech, R. L. Vaughn, J. S. Wilkes and J. L. Williams, *The Journal of Physical Chemistry*, 1984, **88**, 2614–2621.
10. Y. Zheng, K. Dong, Q. Wang, J. Zhang and X. Lu, *J. Chem. Eng. Data*, 2013, **58**, 32–42.
11. C. P. Fredlake, J. M. Crosthwaite, D. G. Hert, S. N. V. K. Aki and J. F. Brennecke, *J. Chem. Eng. Data*, 2004, **49**, 954–964.
12. E. Gómez, B. González, A. Domínguez, E. Tojo and J. Tojo, *J. Chem. Eng. Data*, 2006, **51**, 696–701.
13. C. Liu, W. Chen, Z. Wu, B. Gao, X. Hu, Z. Shi and Z. Wang, *Journal of Molecular Liquids* 2017, **247**, 57–63.
